# Supplementary material for: Malaria-Associated Factors among Pregnant Women in Guinea
Source: Hindawi journal article supplement (doi:10.1155/2019/3925094), 2019-11-15
Supplement: f1 [file 3925094.f1.zip]

**Table :** Characteristics of study population (N=1000)

| Demographic characteristics | n(%)       |
|-----------------------------|------------|
| Age (years)                 |            |
| [14,18]                     | 193 (19.3) |
| (18,35]                     | 752 (75.2) |
| (35,45]                     | 55 (5.5)   |
| Marital status              |            |
| unmarried                   | 209 (20.9) |
| married                     | 791 (79.1) |
| Preterm delivery            |            |
| No                          | 604 (60.4) |
| Yes                         | 396 (39.6) |
| Residence                   |            |
| Kankan                      | 250 (25.0) |
| Forécariah                  | 250 (25.0) |
| Guéckédou                   | 250 (25.0) |
| N'zérokéré                  | 250 (25.0) |
| Lived time                  |            |
| <6 months                   | 180 (18.0) |
| > 6 months                  | 820 (82.0) |
| Characteristic of residence |            |
| Urban                       | 727 (72.7) |
| Rural                       | 273 (27.3) |
| Source of water             |            |
| Drilling                    | 176 (17.6) |
| Well                        | 518 (51.8) |
| Rainwater                   | 306 (30.6) |
| Level of education          |            |
| Any level                   | 562 (56.2) |
| Primary                     | 159 (15.9) |
| Secondary                   | 234 (23.4) |
| University                  | 45 (4.5)   |
| Profession of parturients   |            |

|                                 |            |
|---------------------------------|------------|
| Housewife                       | 469 (46.9) |
| Freelance                       | 348 (34.8) |
| Civil servant                   | 183 (18.3) |
| Head of household profession    |            |
| Civil servant                   | 236 (23.6) |
| Farmer                          | 251 (25.1) |
| Freelance                       | 451 (45.1) |
| Unemployed                      | 62 (6.2)   |
| Status of household             |            |
| monogamous                      | 492 (49.2) |
| polygamous                      | 312 (31.2) |
| single                          | 196 (19.6) |
| Stagnant water                  |            |
| No                              | 709 (70.9) |
| Yes                             | 291 (29.1) |
| Garbage                         |            |
| Yes                             | 420 (42.0) |
| No                              | 580 (58.0) |
| Means of transport              |            |
| Owner                           | 188 (18.8) |
| Feet                            | 539 (53.9) |
| Taxi                            | 273 (27.3) |
| Distance to ANC health facility |            |
| Yes                             | 877 (87.7) |
| No                              | 123 (12.3) |
| Regular use of MILDA            |            |
| Yes                             | 538 (53.8) |
| No                              | 462 (46.2) |
| ANCnumber                       |            |
| Normal ANC                      | 300 (30.0) |
| Low ANC                         | 700 (70.0) |
| Gravidity                       |            |

|                              |            |                    |
|------------------------------|------------|--------------------|
| Primigravid                  | 376 (37.6) |                    |
| Paucigravid                  | 330 (33.0) |                    |
| Multigravid                  | 294 (29.4) |                    |
| Parity                       |            |                    |
| Primiparous                  | 7 (0.7)    |                    |
| Pauciparous                  | 597 (59.7) |                    |
| Multiparous                  | 396 (39.6) |                    |
| SP doses                     |            |                    |
| ≤2 doses                     | 645 (64.5) |                    |
| ≥3 doses                     | 355 (35.5) |                    |
| Other antimalarial drugs     |            |                    |
| Yes                          | 403 (40.3) |                    |
| No                           | 597 (59.7) |                    |
| Continued                    |            |                    |
| Medicinal plant              |            |                    |
| Yes                          | 312 (31.2) |                    |
| No                           | 688 (68.8) |                    |
| Newborn                      |            |                    |
| Living                       | 945 (94.5) |                    |
| Dead                         | 55 (5.5)   |                    |
| Peripheral malaria           |            |                    |
| Negative                     | 842 (84.2) |                    |
| Positive                     | 158 (15.8) |                    |
| Placental malaria            |            |                    |
| Negative                     | 852 (85.2) |                    |
| Positive                     | 148 (14.8) |                    |
| Newborn malaria              |            |                    |
| Negative                     | 972 (97.2) |                    |
| Positive                     | 28 (2.8)   |                    |
| Weight                       |            |                    |
| Normal                       | 887 (88.7) |                    |
| LBW                          | 113 (11.3) |                    |
| <b>Other characteristics</b> |            | <b>means (sd))</b> |
| Age                          |            | 24.38±6.2          |
| Peripheral Density           |            | 1872.30 (12317.16) |

|                         |                   |
|-------------------------|-------------------|
| Placental density       | 1478.64 (9665.67) |
| Density for newborn     | 2.90 (33.37)      |
| Temperature parturients | 37.07 (0.60)      |
| Temperature newborns    | 36.39 (0.64)      |
| APGAR1                  | 8.68 (2.13)       |
| APGAR2                  | 9.32 (2.29)       |

---
