# Supplementary material for: Malaria-Associated Factors among Pregnant Women in Guinea
Source: Hindawi journal article supplement (doi:10.1155/2019/3925094), 2019-11-15
Supplement: f1 [file 3925094.f1.zip]

**Table 1:** univariate analysis using women who had both peripheral and placental malaria. N=1000

| <b>Variables</b>                | <b>Levels</b> | <b>No (%)</b> | <b>Yes (%)</b> | <b>OR</b> | <b>95% CI</b> |
|---------------------------------|---------------|---------------|----------------|-----------|---------------|
| Age                             | [14,18]       | 167 (19.0)    | 26 (21.3)      |           |               |
|                                 | (18,35]       | 657 (74.8)    | 95 (77.9)      | 0.93      | 0.59-1.51     |
|                                 | (35,45]       | 54 (6.2)      | 1 (0.8)        | 0.12      | 0.01-0.58     |
| Marital status                  | Unmarried     | 182 (20.7)    | 27 (22.1)      |           |               |
|                                 | Married       | 696 (79.3)    | 95 (77.9)      | 0.92      | 0.59-1.48     |
| Preterm delivery                | Term          | 527 (60.0)    | 77 (63.1)      |           |               |
|                                 | Preterm       | 351 (40.0)    | 45 (36.9)      | 0.88      | 0.59-1.29     |
| Residence                       | Kankan        | 228 (26.0)    | 22 (18.0)      |           |               |
|                                 | Forecariah    | 207 (23.6)    | 43 (35.2)      | 2.15      | 1.26-3.78     |
|                                 | Gueckédou     | 204 (23.2)    | 46 (37.7)      | 2.34      | 1.37-4.08     |
|                                 | N'Zérékoré    | 239 (27.2)    | 11 (9.0)       | 0.48      | 0.22-0.99     |
| Lived time                      | ≤6 months     | 146 (16.6)    | 34 (27.9)      |           |               |
|                                 | ≥6 months     | 732 (83.4)    | 88 (72.1)      | 0.52      | 0.34-0.80     |
| Characteristic of residence     | Urban         | 650 (74.0)    | 77 (63.1)      |           |               |
|                                 | Rural         | 228 (26.0)    | 45 (36.9)      | 1.67      | 1.11-2.47     |
| Source of water                 | Drilling      | 164 (18.7)    | 12 (9.8)       |           |               |
|                                 | Well          | 442 (50.3)    | 76 (62.3)      | 2.35      | 1.29-4.65     |
|                                 | Rainwater     | 272 (31.0)    | 34 (27.9)      | 1.71      | 0.88-3.52     |
| Education                       | University    | 43 (4.9)      | 2 (1.6)        |           |               |
|                                 | Illeterate    | 483 (55.0)    | 79 (64.8)      | 3.52      | 1.05-21.83    |
|                                 | Primary       | 138 (15.7)    | 21 (17.2)      | 3.27      | 0.91-20.97    |
|                                 | Secondary     | 214 (24.4)    | 20 (16.4)      | 2.01      | 0.56-12.88    |
| Profession of parturient        | Housewife     | 402 (45.8)    | 67 (54.9)      |           |               |
|                                 | Freelance     | 310 (35.3)    | 38 (31.1)      | 0.74      | 0.48-1.12     |
|                                 | Civil servant | 166 (18.9)    | 17 (13.9)      | 0.61      | 0.34-1.05     |
| Profession of head of household | Civil servant | 217 (24.7)    | 19 (15.6)      |           |               |
|                                 | Farmer        | 211 (24.0)    | 40 (32.8)      | 2.17      | 1.23-3.93     |
| Continued                       |               |               |                |           |               |
|                                 | Freelance     | 397 (45.2)    | 54 (44.3)      | 1.55      | 0.91-2.75     |

|                                   |              |            |            |      |           |
|-----------------------------------|--------------|------------|------------|------|-----------|
|                                   | Unemployed   | 53 (6.0)   | 9 (7.4)    | 1.94 | 0.80-4.43 |
| Status of household               | Monogamous   | 437 (49.8) | 55 (45.1)  |      |           |
|                                   | polygamous   | 271 (30.9) | 41 (33.6)  | 1.20 | 0.78-1.85 |
|                                   | Single       | 170 (19.4) | 26 (21.3)  | 1.22 | 0.73-1.98 |
| Backwater                         | No           | 631 (71.9) | 78 (63.9)  |      |           |
|                                   | Yes          | 247 (28.1) | 44 (36.1)  | 1.44 | 0.96-2.14 |
| Garbage                           | No           | 365 (41.6) | 55 (45.1)  |      |           |
|                                   | Yes          | 513 (58.4) | 67 (54.9)  | 0.87 | 0.59-1.27 |
| Means of transport for ANC        | Owner        | 176 (20.0) | 12 (9.8)   |      |           |
|                                   | Feet         | 451 (51.4) | 88 (72.1)  | 2.86 | 1.59-5.63 |
|                                   | Taxi         | 251 (28.6) | 22 (18.0)  | 1.29 | 0.63-2.75 |
| Distance from ANC health facility | Yes          | 773 (88.0) | 104 (85.2) |      |           |
|                                   | No           | 105 (12.0) | 18 (14.8)  | 1.27 | 0.72-2.14 |
| Regular use LLINs                 | Yes          | 506 (57.6) | 32 (26.2)  |      |           |
|                                   | No           | 372 (42.4) | 90 (73.8)  | 3.83 | 2.53-5.93 |
| ANC visits number                 | Normal ANC   | 276 (31.4) | 24 (19.7)  |      |           |
|                                   | Low ANC      | 602 (68.6) | 98 (80.3)  | 1.87 | 1.19-3.05 |
| Gravidity                         | Primigravid  | 331 (37.7) | 45 (36.9)  |      |           |
|                                   | Paucigravid  | 285 (32.5) | 45 (36.9)  | 1.16 | 0.75-1.81 |
|                                   | Multigravida | 262 (29.8) | 32 (26.2)  | 0.90 | 0.55-1.45 |
| Parity                            | Primiparous  | 5 (0.6)    | 2 (1.6)    |      |           |
|                                   | Pauciparous  | 530 (60.4) | 67 (54.9)  | 0.32 | 0.07-2.24 |
|                                   | Multiparous  | 343 (39.1) | 53 (43.4)  | 0.39 | 0.08-2.74 |
| SP dose                           | ≤2 doses     | 553 (63.0) | 92 (75.4)  |      |           |
|                                   | ≥3 doses     | 325 (37.0) | 30 (24.6)  | 0.55 | 0.35-0.85 |
| Other antimalarial drugs          | Yes          | 354 (40.3) | 49 (40.2)  |      |           |
|                                   | No           | 524 (59.7) | 73 (59.8)  | 1.01 | 0.69-1.49 |
| Medicinal plant                   | Yes          | 282 (32.1) | 30 (24.6)  |      |           |
|                                   | No           | 596 (67.9) | 92 (75.4)  | 1.45 | 0.95-2.28 |

---

**Table 2:** Univariate analysis using women who had only peripheral malaria.N=36

| Variables                         | Levels        | No (%)     | Yes (%)   | OR   | 95% CI    |
|-----------------------------------|---------------|------------|-----------|------|-----------|
| Age                               | [14,18]       | 187 (19.4) | 6 (16.7)  |      |           |
|                                   | (18,35]       | 725 (75.2) | 27 (75.0) | 1.16 | 0.50-3.15 |
|                                   | (35,45]       | 52 (5.4)   | 3 (8.3)   | 1.80 | 0.37-7.06 |
| Marital status                    | Unmarried     | 200 (20.7) | 9 (25.0)  |      |           |
|                                   | Married       | 764 (79.3) | 27 (75.0) | 0.79 | 0.38-1.79 |
| Preterm delivery                  | Term          | 582 (60.4) | 22 (61.1) |      |           |
|                                   | Preterm       | 382 (39.6) | 14 (38.9) | 0.97 | 0.48-1.90 |
| Residence                         | Kankan        | 244 (25.3) | 6 (16.7)  |      |           |
|                                   | Forecariah    | 246 (25.5) | 4 (11.1)  | 0.66 | 0.17-2.34 |
|                                   | Gueckédou     | 238 (24.7) | 12 (33.3) | 2.05 | 0.78-5.97 |
|                                   | N'Zérékoré    | 236 (24.5) | 14 (38.9) | 2.41 | 0.95-6.91 |
| Lived time                        | ≤6 months     | 175 (18.2) | 5 (13.9)  |      |           |
|                                   | ≥6 months     | 789 (81.8) | 31 (86.1) | 1.38 | 0.57-4.07 |
| Characteristic of residence       | Urban         | 704 (73.0) | 23 (63.9) |      |           |
|                                   | Rural         | 260 (27.0) | 13 (36.1) | 1.53 | 0.74-3.02 |
| Source of water                   | Drilling      | 169 (17.5) | 7 (19.4)  |      |           |
|                                   | Well          | 497 (51.6) | 21 (58.3) | 1.02 | 0.45-2.63 |
|                                   | Rainwater     | 298 (30.9) | 8 (22.2)  | 0.65 | 0.23-1.88 |
| Education                         | University    | 43 (4.5)   | 2 (5.6)   |      |           |
|                                   | Illeterate    | 541 (56.1) | 21 (58.3) | 0.83 | 0.23-5.33 |
|                                   | Primary       | 151 (15.7) | 8 (22.2)  | 1.14 | 0.27-7.73 |
|                                   | Secondary     | 229 (23.8) | 5 (13.9)  | 0.47 | 0.10-3.35 |
| Profession of parturient          | Housewife     | 450 (46.7) | 19 (52.8) |      |           |
|                                   | Freelance     | 334 (34.6) | 14 (38.9) | 0.99 | 0.48-2.00 |
|                                   | Civil servant | 180 (18.7) | 3 (8.3)   | 0.39 | 0.09-1.18 |
| Profession of head of household   | Civil servant | 225 (23.3) | 11 (30.6) |      |           |
|                                   | Farmer        | 242 (25.1) | 9 (25.0)  | 0.76 | 0.30-1.87 |
|                                   | Freelance     | 438 (45.4) | 13 (36.1) | 0.61 | 0.27-1.40 |
|                                   | Unemployed    | 59 (6.1)   | 3 (8.3)   | 1.04 | 0.23-3.46 |
| Status of household               | Monogamous    | 473 (49.1) | 19 (52.8) |      |           |
|                                   | polygamous    | 302 (31.3) | 10 (27.8) | 0.82 | 0.36-1.76 |
|                                   | Single        | 189 (19.6) | 7 (19.4)  | 0.92 | 0.36-2.14 |
| Backwater                         | No            | 683 (70.9) | 26 (72.2) |      |           |
|                                   | Yes           | 281 (29.1) | 10 (27.8) | 0.93 | 0.42-1.91 |
| Garbage                           | No            | 400 (41.5) | 20 (55.6) |      |           |
|                                   | Yes           | 564 (58.5) | 16 (44.4) | 0.57 | 0.29-1.11 |
| Means of transport for ANC        | Owner         | 180 (18.7) | 8 (22.2)  |      |           |
|                                   | Feet          | 521 (54.0) | 18 (50.0) | 0.78 | 0.34-1.92 |
|                                   | Taxi          | 263 (27.3) | 10 (27.8) | 0.86 | 0.33-2.28 |
| Distance from ANC health facility | Yes           | 846 (87.8) | 31 (86.1) |      |           |
|                                   | No            | 118 (12.2) | 5 (13.9)  | 1.16 | 0.39-2.79 |

|                          |              |            |           |         |              |
|--------------------------|--------------|------------|-----------|---------|--------------|
| Regular use LLINs        | Yes          | 518 (53.7) | 20 (55.6) | 0.93    | 0.47-1.81    |
|                          | No           | 446 (46.3) | 16 (44.4) |         |              |
| ANC visits number        | Normal ANC   | 292 (30.3) | 8 (22.2)  | 1.52    | 0.72-3.61    |
|                          | Low ANC      | 672 (69.7) | 28 (77.8) |         |              |
| Gravidity                | Primigravid  | 366 (38.0) | 10 (27.8) | 1.14    | 0.46-2.82    |
|                          | Paucigravid  | 320 (33.2) | 10 (27.8) |         |              |
|                          | Multigravida | 278 (28.8) | 16 (44.4) |         |              |
| Parity                   | Primiparous  | 7 (0.7)    | 0 (0.0)   | 458746. | 74 (0.00-NA) |
|                          | Pauciparous  | 580 (60.2) | 17 (47.2) |         |              |
|                          | Multiparous  | 377 (39.1) | 19 (52.8) |         |              |
| SP dose                  | ≤2 doses     | 623 (64.6) | 22 (61.1) | 1.16    | 0.57-2.28    |
|                          | ≥3 doses     | 341 (35.4) | 14 (38.9) |         |              |
| Other antimalarial drugs | Yes          | 391 (40.6) | 12 (33.3) | 1.36    | 0.69-2.85    |
|                          | No           | 573 (59.4) | 24 (66.7) |         |              |
| Medicinal plant          | Yes          | 304 (31.5) | 8 (22.2)  | 1.61    | 0.76-3.83    |
|                          | No           | 660 (68.5) | 28 (77.8) |         |              |
