# Supplementary figures and images for: Malaria-Associated Factors among Pregnant Women in Guinea
Source: Hindawi journal article supplement (doi:10.1155/2019/3925094), 2019-11-15

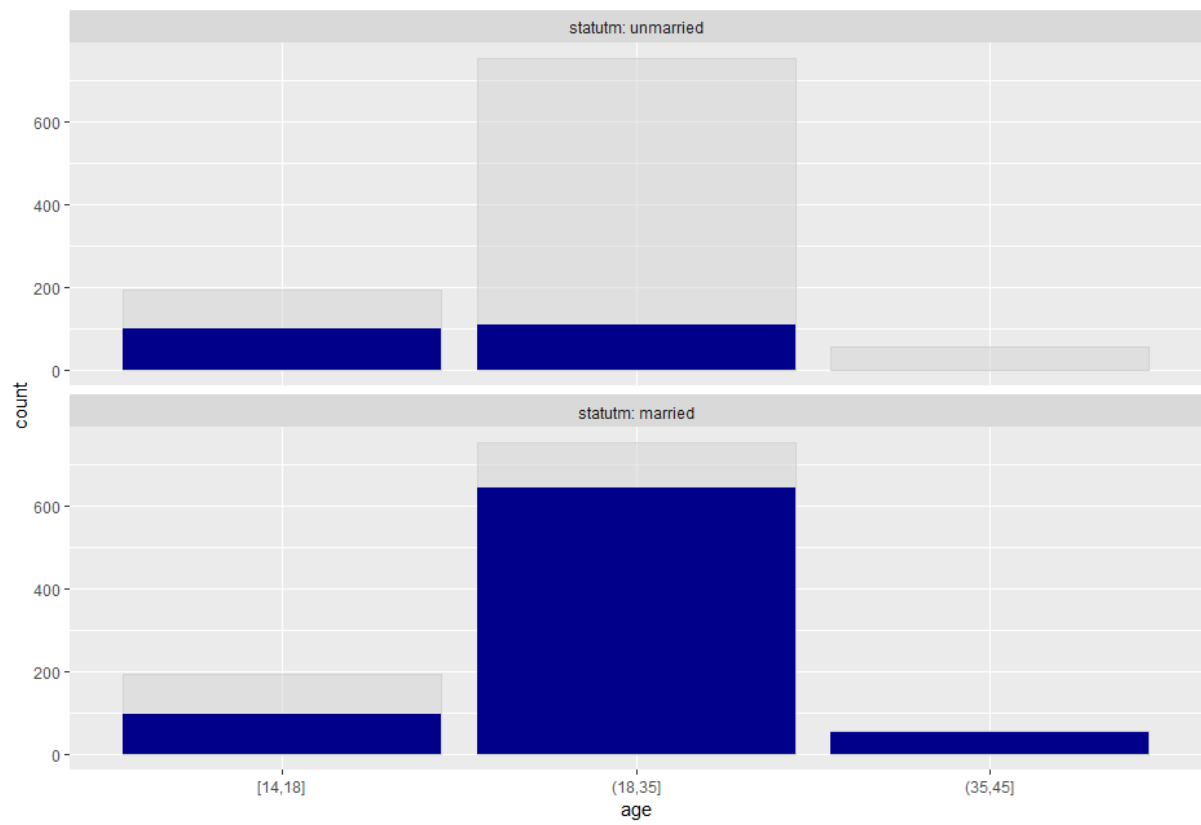

Figure 3: relation marital status and age

Supplement: f1 [file 3925094.f1.zip]
